# Supplementary material
Source: Springer Nature journal article supplement (https://www.springermedizin.de/resource/supplementary/13045_2013_327_MOESM6_ESM.pdf/9661132)
Supplement: MOESM6 [file 9661132]

**Table 2 Selected strategies using epigenetic tools for leukemia diagnostic as proposed in the International Database for Patents of Inventions.**

| <b>Patent document</b> | <b>Target gene</b>                                       | <b>Method based on</b>                                                                                  |
|------------------------|----------------------------------------------------------|---------------------------------------------------------------------------------------------------------|
| WO2006060429           | HDAC1 gene                                               | Detection of five point mutations in HDAC1: M51L, Q111K, T114A, V157G and a premature stop codon at R34 |
| WO2012078288           | DNMT3A                                                   | Detection of one or more mutations, mainly at Arg-882                                                   |
| WO2009150229           | TET2                                                     | Detection of expression levels or mutations in this putative suppressor gene                            |
| US2009317801           | Genes located on the long arm of chromosome 17 (17q25.3) | Analysis of methylation state of a target gene in this chromosomal region                               |
| US2011281270           | CEBPA                                                    | Detection of bi allelic mutations in CCAAT-enhancer binding protein gene                                |
